# Supplementary material for: 15-Deoxy-Δ12,14-prostaglandin J2 promotes phosphorylation of eukaryotic initiation factor 2α and activates the integrated stress response
Source: PubMed Central journal article supplement (PMC6484127; doi:10.1074/jbc.ra118.007138), 2019-02-05
Supplement: supp_RA118.007138_142550_1_supp_268010_plc2nf.pdf [file supp_RA118.007138_142550_1_supp_268010_plc2nf.pdf]

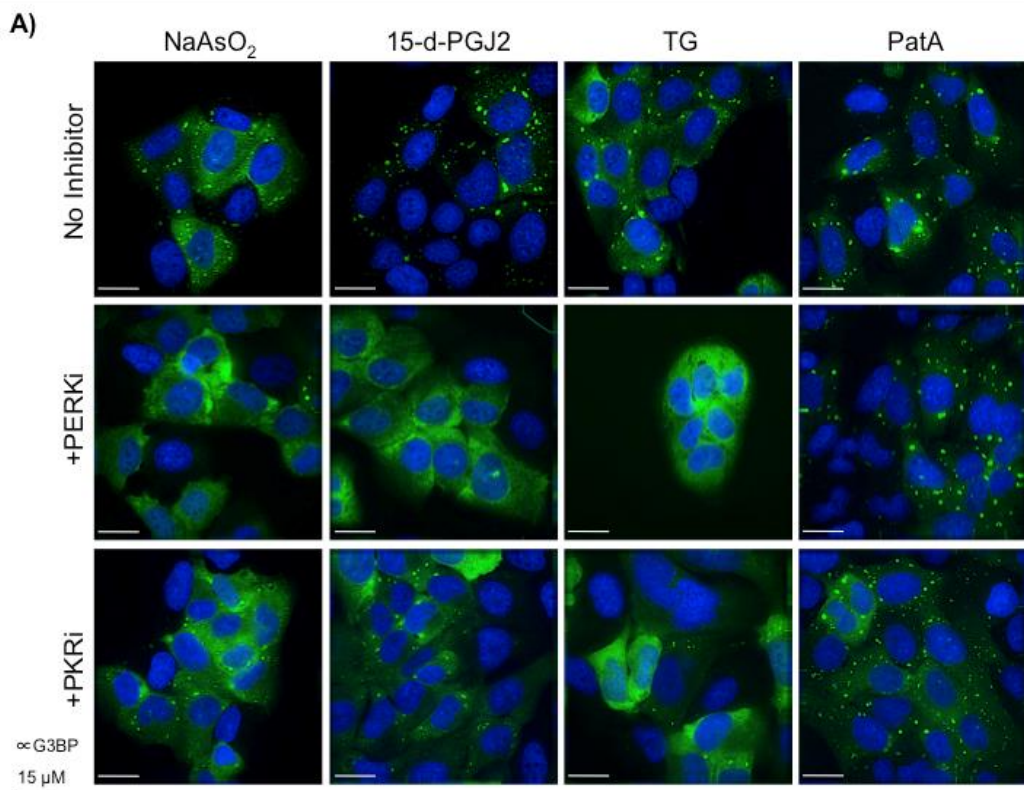

**Supplemental Figure 1: eIF2 $\alpha$  kinase inhibitors prevent SG formation for 15-d-PGJ2.**  
**(A)** Representative images for the quantifications in Figure 3B&C. The SG response of GFP-G3BP1 expressing U2OS cells for NaAsO<sub>2</sub> (100  $\mu$ M), 15-d-PGJ2 (10  $\mu$ M), and TG (500 nM) were all diminished with 15 mins pre-incubation with PERKi (1  $\mu$ M), and the SG responses were slightly diminished with the same pre-incubation in PKRi (1  $\mu$ M). PatA (100 nM) SGs remained unaffected with inhibitor treatments.

**A)**

|                   | Protein                   | MASCOT Score |
|-------------------|---------------------------|--------------|
| HSPs              | HSP90-beta                | 673          |
|                   | HSP90-alpha               | 441          |
| Proteasome        | Ribonuclease Inhibitor    | 199          |
| Translation       | eIF3F                     | 163          |
|                   | Arginyl-tRNA synthetase   | 158          |
| Mitochondria      | ATP Synthase              | 133          |
|                   | Alanyl-tRNA Synthetase    | 128          |
| Negative feedback | Cytochrome b              | 128          |
| HSPs              | HSP75                     | 121          |
|                   | 26S regulatory subunit 2  | 107          |
|                   | 26S regulatory subunit 12 | 94           |
|                   | 26S regulatory subunit 11 | 94           |
| Translation       | eIF4A                     | 87           |
|                   | 26S regulatory subunit 8  | 87           |
|                   | PABP1                     | 81           |
|                   | PABP4                     | 78           |
|                   | FMR1 Interacting Protein  | 77           |
| Translation       | eIF3D                     | 76           |
|                   | 26S regulatory subunit 6B | 72           |
|                   | 26S regulatory subunit 7  | 71           |
|                   | 60S RP P0                 | 70           |
|                   | 26S regulatory subunit 6A | 70           |
| Negative feedback | PP1                       | 68           |
|                   | 26S regulatory subunit 6  | 65           |
|                   | SRPR                      | 61           |
| HSPs              | GRP75                     | 60           |
|                   | 26S regulatory subunit 3  | 53           |
| Translation       | eIF4G                     | 52           |
|                   | 26S regulatory subunit 13 | 50           |
|                   | eIF3B                     | 50           |
|                   | 26S regulatory subunit 14 | 49           |
|                   | eIF3H                     | 46           |
|                   | 26S regulatory subunit 1  | 43           |
|                   | DHX9                      | 42           |
|                   | 26S regulatory subunit 10 | 42           |
| Translation       | PABP3                     | 38           |

**Supplemental Figure 2: 15-d-PGJ2 covalently modifies many protein candidates for eIF2 $\alpha$  phosphorylation or translational shutoff.**

(A) Mass spectrum protein candidates for eIF2 $\alpha$ K activation (data from Marcone et al. 2013). 26S regulatory subunits marked in red are bound by 15-d-PGJ2 and are most likely inhibited. However, many more proteins are outlined that could potentially contribute to kinase activation or translational shutoff such as tRNA synthetases (white), HSPs (green), and the eIF2 $\alpha$  phosphatase PP1 (orange).

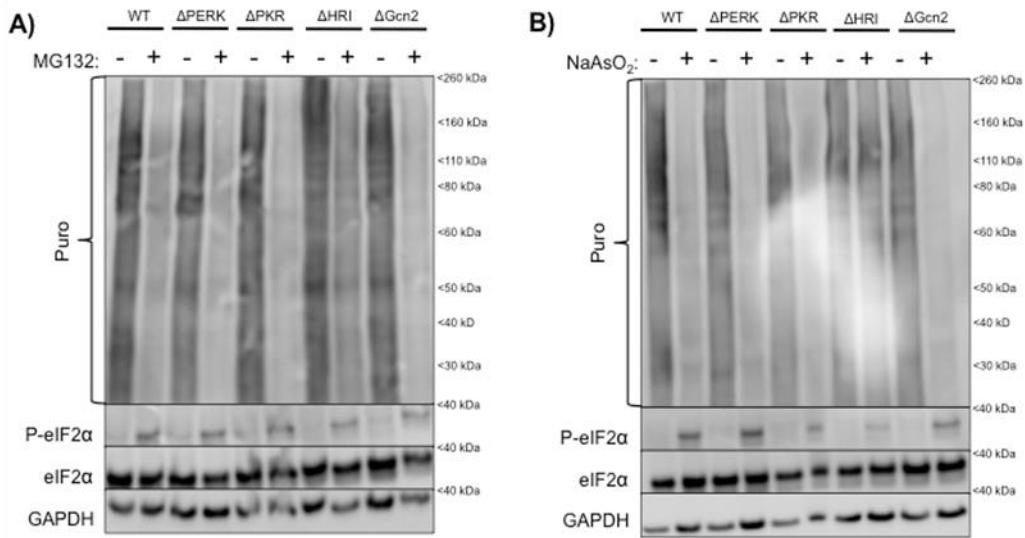

**Supplemental Figure 3: MG132 activates multiple eIF2αKs with partial reductions in magnitude from ΔHRI in HAP1 cells.**

(A) Western blot depicting translation and eIF2α phosphorylation before or after MG132 (10 μM) addition across various kinase deletion backgrounds in HAP1 cells. ΔHRI partially inhibited translational shutoff and P-eIF2α. (B) Western Blot depicting NaAsO<sub>2</sub> (100 μM) treated HAP1 cells. ΔHRI prevented translational shutoff and partially prevented P-eIF2α.
